# Supplementary material for: PTEN loss correlates with T cell exclusion across human cancers
Source: BMC Cancer. 2021 Apr 19;21:429. doi: 10.1186/s12885-021-08114-x (PMC8054401; doi:10.1186/s12885-021-08114-x)
Supplement: Supplementary file 1 — Additional file 1: Supplementary Table 1. Summary of the basic information of 21 solid tumors. Supplementary Table 2. Detailed information of Chen et al. cohort. Supplementary Table 3. Detailed information of Riaz et al. cohort [file 12885_2021_8114_MOESM1_ESM.xlsx]

## Sheet: sTable 1
Table 1. Summary of the basic information of 21 solid tumors
Cancer	Name	Total	PTEN loss	PIK3CA gain	PIK3CB gain	TCPA data available
BLCA	Bladder Urothelial Carcinoma	272	117	169	135	240
BRCA	Breast invasive carcinoma	1069	341	565	266	850
COAD	Colon adenocarcinoma	407	113	44	18	316
GBM	Glioblastoma multiforme	168	149	46	32	73
HNSC	Head and Neck squamous cell carcinoma	481	129	365	293	321
KICH	Kidney Chromophobe	66	3	5	6	63
KIRC	Kidney renal clear cell carcinoma	539	99	89	74	450
KIRP	Kidney renal papillary cell carcinoma	225	3	79	75	170
LGG	Brain Lower Grade Glioma	525	116	57	8	432
LIHC	Liver hepatocellular carcinoma	208	61	38	29	171
LUAD	Lung adenocarcinoma	474	142	145	112	325
LUSC	Lung squamous cell carcinoma	479	260	420	323	311
OV	Ovarian serous cystadenocarcinoma	339	138	272	210	242
PAAD	Pancreatic adenocarcinoma	179	32	28	25	98
PRAD	Prostate adenocarcinoma	422	129	63	60	300
READ	Rectum adenocarcinoma	156	48	16	13	122
SARC	Sarcoma	251	137	45	41	213
SKCM	Skin Cutaneous Melanoma	369	193	60	56	279
STAD	Stomach adenocarcinoma	146	44	66	41	125
THCA	Thyroid carcinoma	502	13	5	3	371
UCEC	Uterine Corpus Endometrial Carcinoma	518	326	331	119	394
PTEN loss: PTEN with loss of function mutation or with copy number <-1; PIK3CA/PIK3CB gain: PIK3CA/PIK3CB with gain of function mutation or with copy number >1 were defined as PIK3CA/PIK3CB gain.

## Sheet: sTable 2
Supplementary Table 2. Detailed information of Chen et al. cohort
Patient_ID	PTEN	CD4	CD8A	VEGFA	Biopsy Timepoint	anti_CTLA_4_response	anti_PD_1_response	Biopsy_site
19	6.516	7.747	9.162	10.06	Pre-aCTLA4	NR	NR	Axillary LN
43	8.9	9.054	5.489	11.99	Pre-aCTLA4	NR	NR	Abd wall
9	9.02	9.088	7.105	9.317	Pre-aCTLA4	NR	R	Leg
42	9.301	9.95	8.988	10.52	Pre-aCTLA4	NR	NR	Iliac LN
22	9.419	8.434	4.046	14.02	Pre-aCTLA4	R	N/A	Axillary LN
6	9.501	8.578	7.721	9.249	on aCTLA4	NR	R	Abdomen
25	9.534	10.15	10.77	8.605	Pre-aCTLA4	NR	NR	Chest
50	9.546	8.815	7.228	11.45	Pre-aCTLA4	NR	NR	Inguinal LN
31	9.601	9.335	9.397	9.358	Pre-aCTLA4	R	N/A	Lung
5	9.618	9.222	8.989	11.3	Pre-aCTLA4	R	N/A	Parotid
23	9.897	9.061	7.46	9.673	Pre-aCTLA4	NR	NR	Foot
18	10.11	9.433	7.629	9.251	Pre-aCTLA4	NR	NR	Groin skin
10	10.14	8.939	8.151	10.54	Pre-aCTLA4	R	N/A	Axillary skin
47	10.14	10.25	7.329	10.4	Pre-aCTLA4	NR	R	Shoulder
27	10.15	12.04	11.74	11.84	on aCTLA4	R	N/A	Spleen
8	10.22	9.315	7.172	10.38	Pre-aCTLA4	NR	R	Scalp
37	10.55	9.616	8.833	11.46	Pre-aCTLA4	R	N/A	Foot
7	10.57	9.874	7.905	10.42	Pre-aCTLA4	NR	R	Leg
19	7.064	7.786	6.171	10.84	On aPD1	NR	NR	Chest
43	8.294	8.78	6.316	11.71	Prog aCTLA4 / Pre aPD1	NR	NR	Abdomen
1	8.81	5.568	6.461	11.79	On aPD1	NR	NR	Abdomen
40	9.376	7.804	6.99	10.95	On aPD1	NR	NR	Post thorax
16	9.384	8.467	9.417	10.51	On aPD1	NR	NR	Chest wall
2	9.43	11.67	10.89	10.15	Prog aCTLA4 / Pre aPD1	NR	NR	Neck
4	9.487	10.11	6.245	12.57	Prog aCTLA4 / Pre aPD1	NR	NR	Chest
25	9.513	7.24	5.451	11.13	Prog aCTLA4 / Pre aPD1	NR	NR	Breast
9	9.674	12.34	10.72	10.32	On aPD1	NR	R	Groin/leg
54	9.693	9.959	9.944	10.31	Prog aCTLA4 / Pre aPD1	NR	NR	Brain
6	9.768	9.027	7.467	9.84	Prog aCTLA4 / Pre aPD1	NR	R	Back
9	9.775	10.17	11.21	9.892	Prog aCTLA4 / Pre aPD1	NR	R	Leg
49	9.787	10.79	8.077	11.72	Prog aCTLA4 / Pre aPD1	NR	NR	Brain
15	9.842	8.6	8.001	11.29	Pre aPD1	N/A	R	Scalp
45	9.853	9.939	8.696	10.64	Prog aPD1	NR	NR	Chest
26	9.874	8.139	7.523	8.857	Prog aPD1	NR	NR	Thigh
24	9.943	11.39	13.25	10.08	On aPD1	NR	R	Arm
18	9.952	9.416	12.56	11.78	Prog aCTLA4 / Pre aPD1	NR	NR	Leg
7	10.02	10.96	12.13	9.844	On aPD1	NR	R	Leg
3	10.16	12.41	10.11	10.5	On aPD1	NR	R	Leg
47	10.23	11.26	13.29	9.327	On aPD1	NR	R	Neck
52	10.31	11.88	11.67	12.9	Prog aCTLA4 / Pre aPD1	NR	R	Neck
8	10.38	11.12	12.33	10.95	Prog aCTLA4 / Pre aPD1	NR	R	Scalp
50	10.39	10.54	11.48	11.2	Prog aCTLA4 / Pre aPD1	NR	NR	Adrenal gland

## Sheet: sTable 3
Supplementary Table 3. Detailed information of Riaz et al. cohort
ID	PTEN	CD4	CD8A	VEGFA	Cohort	Responses	Response	Dead_or_Alive	Time_to_Death(weeks)	Subtype	biopsy_timepoint	M_Stage
Pt1	4.98669	5.24038	3.65012	2.22305	NIV3-PROG	PD	PD	dead	22.9	CUTANEOUS	Pre	M1C
Pt10	4.758	3.40094	-1.20127	3.37629	NIV3-NAIVE	R	SD	dead	36.6	CUTANEOUS	Pre	M1A
Pt101	4.98589	6.32593	4.76715	2.17713	NIV3-PROG	R	PR	alive	119.1	CUTANEOUS	Pre	M1A
Pt103	3.53817	5.46896	3.63706	2.2026	NIV3-PROG	PD	PD	alive	69.1	CUTANEOUS	Pre	M1B
Pt106	3.30407	5.09816	2.94611	3.64738	NIV3-PROG	PD	PD	dead	13	MUCOSAL	Pre	M1C
Pt11	3.79501	5.22594	4.03721	3.7674	NIV3-NAIVE	PD	PD	dead	119.6	CUTANEOUS	Pre	NA
Pt17	4.5491	2.15776	-3.74759	1.98703	NIV3-PROG	PD	PD	dead	8.1	CUTANEOUS	Pre	M1C
Pt18	4.46278	5.44338	3.97424	2.44943	NIV3-NAIVE	R	PR	alive	153.3	CUTANEOUS	Pre	M1A
Pt2	4.6884	5.5035	3.29258	2.89707	NIV3-PROG	R	SD	dead	39.3	OTHER	Pre	M1B
Pt24	4.3333	6.95678	2.75465	4.70008	NIV3-NAIVE	PD	PD	alive	21.3	OTHER	Pre	M1C
Pt26	4.80689	2.87658	0.965081	3.27665	NIV3-PROG	R	SD	alive	136	MUCOSAL	Pre	M1B
Pt27	4.34629	6.62957	1.62347	5.53282	NIV3-NAIVE	PD	PD	dead	67.9	CUTANEOUS	Pre	M1C
Pt28	6.27178	3.8778	2.2032	3.11033	NIV3-NAIVE	PD	PD	dead	105.7	CUTANEOUS	Pre	NA
Pt29	5.00375	4.76762	1.37579	3.71323	NIV3-NAIVE	PD	PD	dead	39	OTHER	Pre	M1C
Pt3	4.43829	2.80176	-0.528482	3.98434	NIV3-NAIVE	R	PR	alive	163.4	CUTANEOUS	Pre	UNKNOWN
Pt30	3.86203	3.38692	1.37156	3.79149	NIV3-NAIVE	R	CR	alive	150.4	MUCOSAL	Pre	M1A
Pt31	4.25888	4.73705	2.72586	2.94601	NIV3-NAIVE	PD	PD	alive	137.3	OTHER	Pre	M1A
Pt34	4.44926	7.15988	4.94606	2.35387	NIV3-PROG	R	PR	alive	119.1	CUTANEOUS	Pre	M1B
Pt36	4.71346	6.19455	-1.42095	3.83535	NIV3-PROG	R	SD	alive	154.4	CUTANEOUS	Pre	M1C
Pt37	3.85646	3.49748	0.78232	2.87751	NIV3-PROG	R	SD	dead	92.3	CUTANEOUS	Pre	M1A
Pt38	4.09498	3.33752	-1.2922	7.50529	NIV3-PROG	R	SD	dead	23.9	CUTANEOUS	Pre	M1C
Pt39	4.74975	1.88095	-4.30472	3.56873	NIV3-PROG	PD	PD	dead	23.7	MUCOSAL	Pre	M1C
Pt4	4.20311	3.68627	2.69041	7.11446	NIV3-NAIVE	R	SD	dead	90.4	CUTANEOUS	Pre	M1B
Pt44	4.05071	5.34315	4.0074	4.68241	NIV3-NAIVE	R	PR	alive	156.1	MUCOSAL	Pre	NA
Pt46	3.87352	7.29985	2.68644	3.06454	NIV3-PROG	PD	PD	dead	32.4	OTHER	Pre	M1A
Pt47	4.57899	5.29407	1.1197	4.42155	NIV3-PROG	PD	PD	dead	102.6	CUTANEOUS	Pre	M1B
Pt48	4.07985	5.50241	2.04231	4.55098	NIV3-PROG	R	CR	alive	149.4	CUTANEOUS	Pre	M1C
Pt49	4.43978	5.81764	4.55293	4.62087	NIV3-PROG	R	PR	alive	118.1	CUTANEOUS	Pre	UNKNOWN
Pt5	4.6133	4.73176	4.06729	2.71306	NIV3-NAIVE	PD	PD	dead	31.7	CUTANEOUS	Pre	M1C
Pt52	4.09347	4.76848	1.08256	3.97457	NIV3-PROG	PD	PD	dead	68	CUTANEOUS	Pre	M1C
Pt59	3.84485	5.51333	3.95417	3.33937	NIV3-NAIVE	R	SD	dead	101.1	CUTANEOUS	Pre	M1A
Pt62	3.38923	2.65373	1.10265	4.71878	NIV3-NAIVE	PD	PD	dead	67.4	OCULAR/UVEAL	Pre	M1C
Pt65	3.89103	5.15095	2.92814	3.86659	NIV3-PROG	R	SD	alive	98.9	ACRAL	Pre	M1B
Pt66	0.781993	2.64889	1.1256	9.1778	NIV3-NAIVE	PD	PD	dead	77.4	CUTANEOUS	Pre	UNKNOWN
Pt67	4.36731	3.03553	2.45754	3.82366	NIV3-PROG	R	SD	alive	147.4	OCULAR/UVEAL	Pre	M1C
Pt72	4.76889	2.97738	-2.78571	6.24189	NIV3-NAIVE	R	PR	dead	110	CUTANEOUS	Pre	M1B
Pt77	4.49506	5.64634	4.48587	3.92268	NIV3-NAIVE	R	SD	dead	67.3	CUTANEOUS	Pre	M1A
Pt78	3.56999	4.15935	-4.30794	5.13908	NIV3-PROG	PD	PD	dead	11.1	CUTANEOUS	Pre	M1C
Pt79	3.99975	3.30767	1.88892	4.34562	NIV3-PROG	R	SD	dead	31.1	OTHER	Pre	UNKNOWN
Pt8	3.08588	4.65254	2.68494	3.33065	NIV3-NAIVE	PD	PD	dead	37	MUCOSAL	Pre	M0
Pt82	5.46381	4.84412	2.71918	2.52882	NIV3-PROG	R	SD	dead	61.3	OCULAR/UVEAL	Pre	M1C
Pt84	4.66116	2.06124	-3.83774	2.76643	NIV3-NAIVE	PD	PD	dead	21.6	OTHER	Pre	M1C
Pt85	4.92014	3.37486	-4.93999	4.00458	NIV3-PROG	PD	PD	alive	129.1	CUTANEOUS	Pre	M1A
Pt89	4.1813	3.53391	0.355637	5.0854	NIV3-NAIVE	R	SD	dead	120.6	CUTANEOUS	Pre	M1A
Pt9	3.42567	5.15745	1.41087	6.38225	NIV3-NAIVE	PD	PD	dead	13.1	CUTANEOUS	Pre	M1C
Pt90	2.92141	4.6753	3.61376	4.21887	NIV3-PROG	PD	PD	dead	24.9	MUCOSAL	Pre	M1C
Pt92	4.53969	5.49011	4.66504	3.01628	NIV3-PROG	R	SD	dead	47.6	CUTANEOUS	Pre	UNKNOWN
Pt94	3.54559	4.6674	2.2583	4.16803	NIV3-NAIVE	R	CR	alive	140.1	CUTANEOUS	Pre	M1C
Pt98	4.93907	3.4448	-0.0119487	2.65852	NIV3-PROG	R	SD	dead	106.7	OCULAR/UVEAL	Pre	M1C
